# Supplementary material for: Hollow sphere manganese–ceria solid solution enhances photocatalytic activity in tetracycline degradation
Source: Royal Society of Chemistry journal article supplement (doi:10.1039/d3nj04299e), 2023-01-01
Supplement: d3nj04299e1.pdf [file d3nj04299e1.pdf]

## Supporting Information

Hollow sphere manganese-ceria solid solution enhances photocatalytic activity in tetracycline degradation

Huiming Shi,<sup>a</sup> Quanquan Shi,<sup>a,c\*</sup> Jinmei Li,<sup>a</sup> GaoLi<sup>b,d\*</sup>

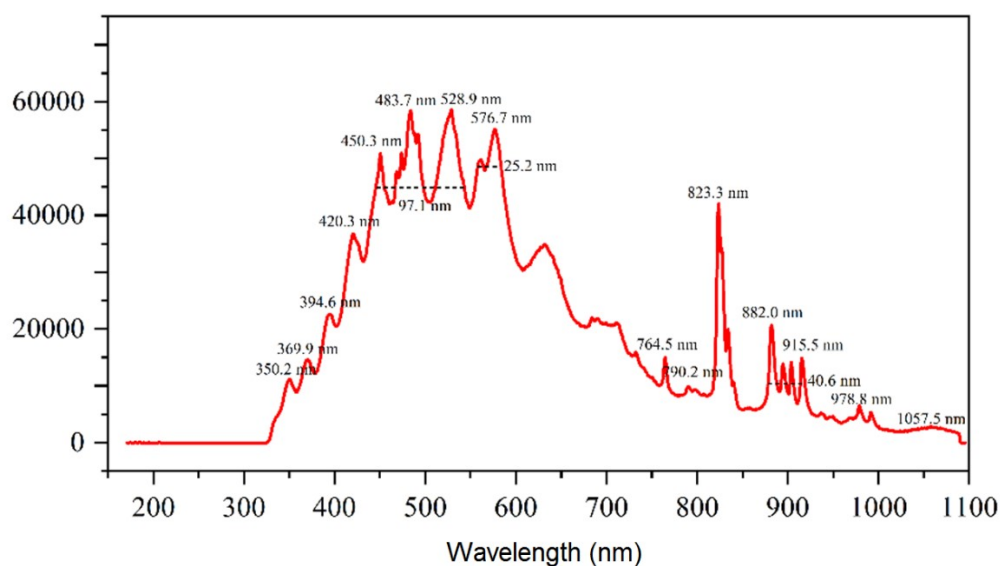

**Fig. S1.** Emission spectrum of a 300 W xenon lamp equipped with a filter up to 420 nm.

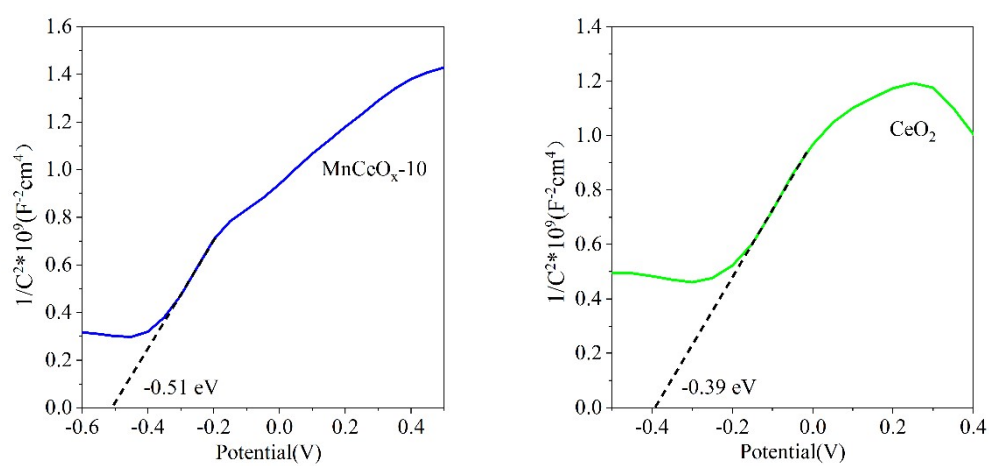

**Fig. S2.** Mott-Schottky diagrams of pure CeO<sub>2</sub> and MnCeO<sub>x</sub>-10 samples.

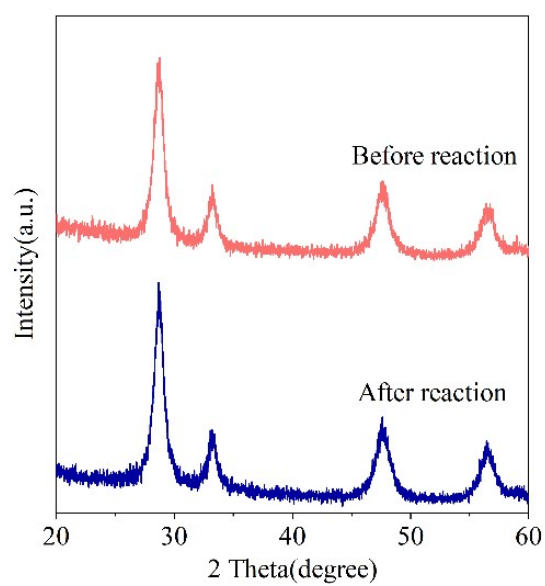

**Fig. S3.** XRD patterns of MnCeO<sub>x</sub>-10 catalyst before and after reaction.
